# Supplementary material for: Genetic variants associated with gestational diabetes mellitus: a meta-analysis and subgroup analysis
Source: PubMed Central journal article supplement (PMC4965817; doi:10.1038/srep30539), 2016-07-29
Supplement: srep30539-s1.pdf [file srep30539-s1.pdf]

**Genetic variants associated with gestational diabetes mellitus: a meta-analysis and subgroup analysis**

Ling Wu, Long Cui, Wing Hung Tam, Ronald C.W. Ma & Chi Chiu Wang

**A**

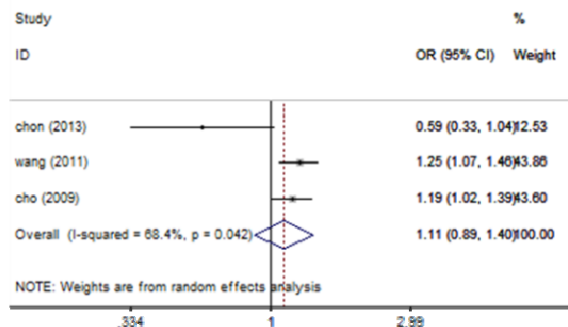

**B**

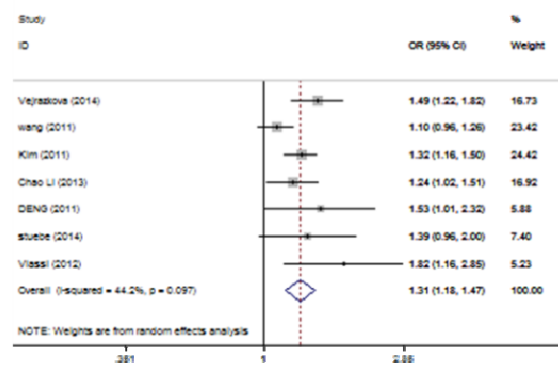

**C**

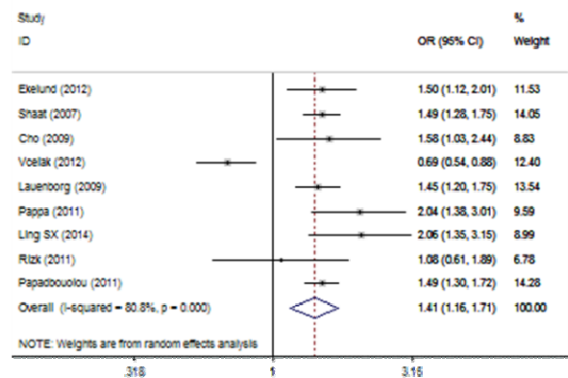

**D**

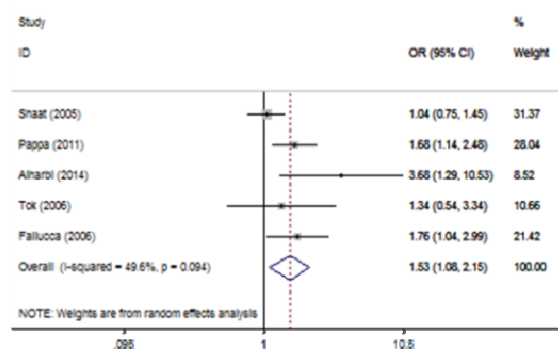

**E**

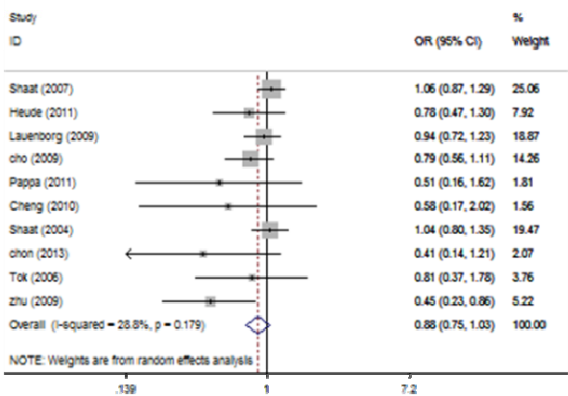

**F**

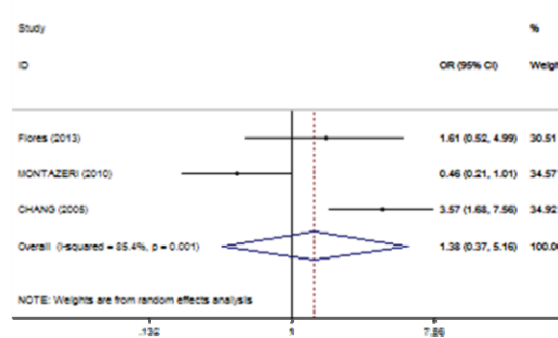

**Supplementary Figure 1** Forest plots of genetic variants in GDM with all included studies. (A) IGF2BP2 rs4402960, (B) MTNR1B rs10830963, (C) TCF7L2 rs7903146, (D) IRS1 rs1801278, (E) PPARG rs1801282, (F) TNF- $\alpha$  rs1800629. The shadowed squares and their lateral tips indicate the ORs and the corresponding 95% CIs in individual studies, The central lines and lateral tips of the diamonds indicate the pooled ORs and the corresponding 95% CIs. The solid vertical lines indicate no effect.

**Genetic variants associated with gestational diabetes mellitus: a meta-analysis and subgroup analysis**

Ling Wu, Long Cui, Wing Hung Tam, Ronald C.W. Ma & Chi Chiu Wang

**A**

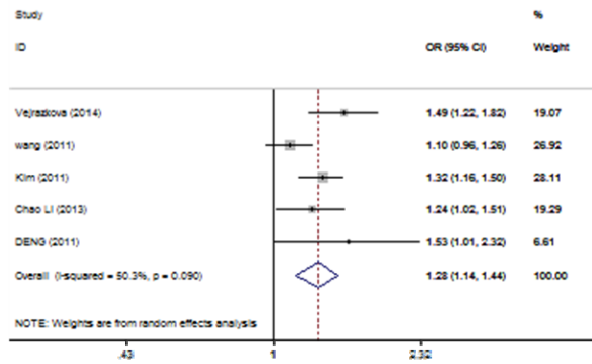

**B**

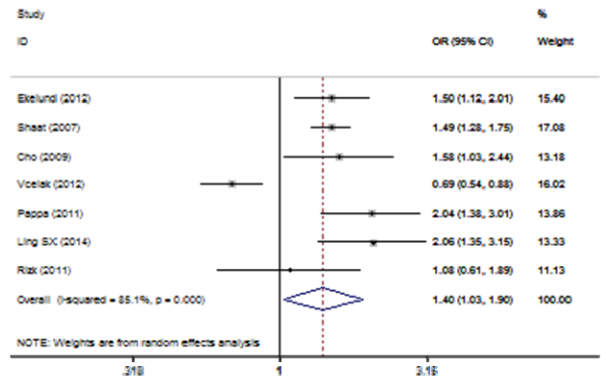

**C**

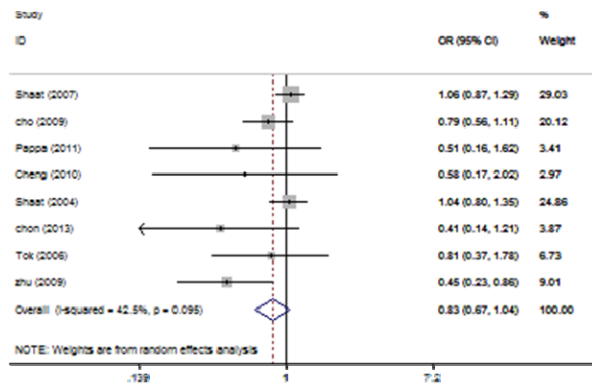

**D**

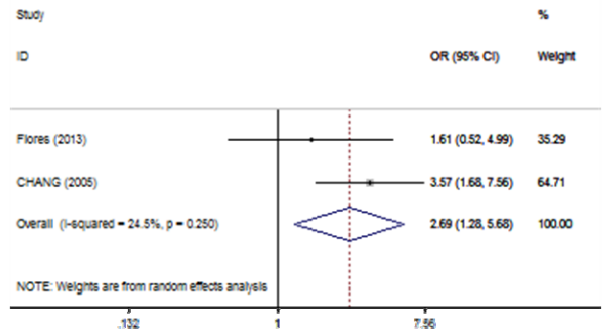

**Supplementary figure 2** Forest plots of genetic variants in GDM with studies after removing articles deviated from Hardy-Weinberg equilibrium in control ( $P < 0.05$ ). (A) MTNR1B rs10830963, (B) TCF7L2 rs7903146, (C) PPARG rs1801282, (D) TNF- $\alpha$  rs1800629. The shadowed squares and their lateral Tips indicate the ORs and the corresponding 95% CIs in individual studies, The central lines and lateral tips of the diamonds indicate the pooled ORs and the corresponding 95% CIs. The solid vertical lines indicate no effect.

A

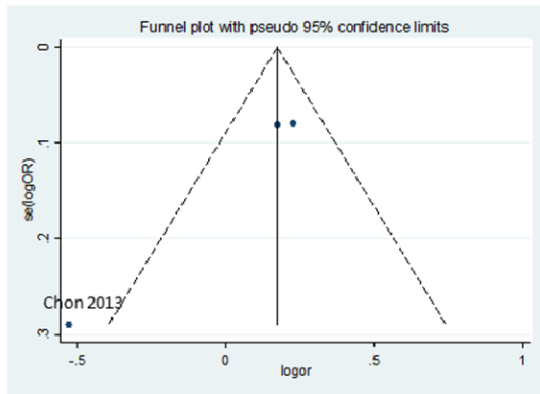

B

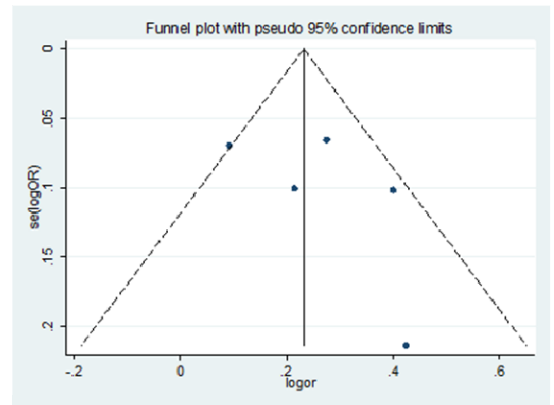

C

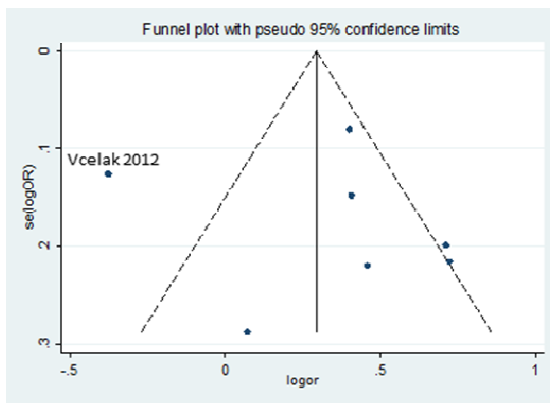

D

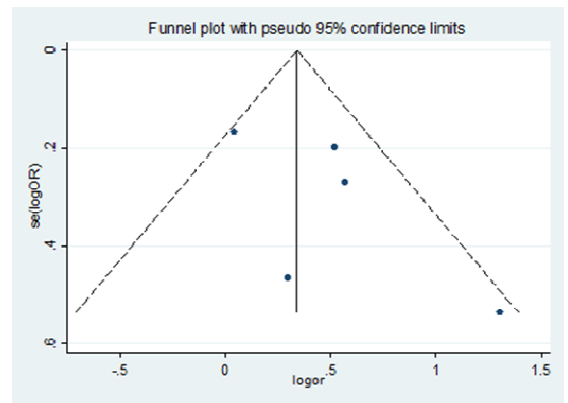

E

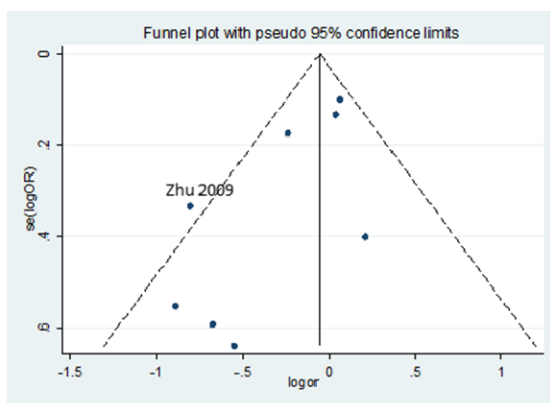

F

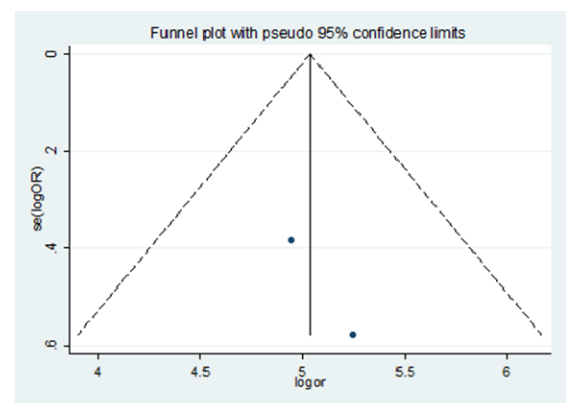

**Supplementary figure 3** Funnel plots on the association of allelic models for GDM risk in a random-effects model (Egger's test). (A) IGF2BP2 rs4402960, (B) MTNR1B rs10830963, (C) TCF7L2 rs7903146, (D) IRS1 rs1801278, (E) PPARG rs1801282, (F) TNF-alpha rs1800629. Se(logOR) as the vertical axis and logOR as horizontal axis.

**Genetic variants associated with gestational diabetes mellitus: a meta-analysis and subgroup analysis**

Ling Wu, Long Cui, Wing Hung Tam, Ronald C.W. Ma & Chi Chiu Wang

**A**

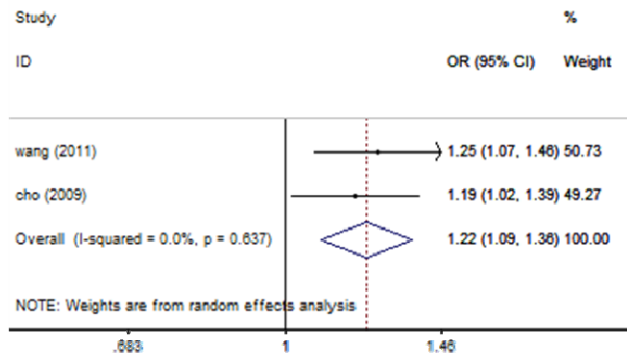

**B**

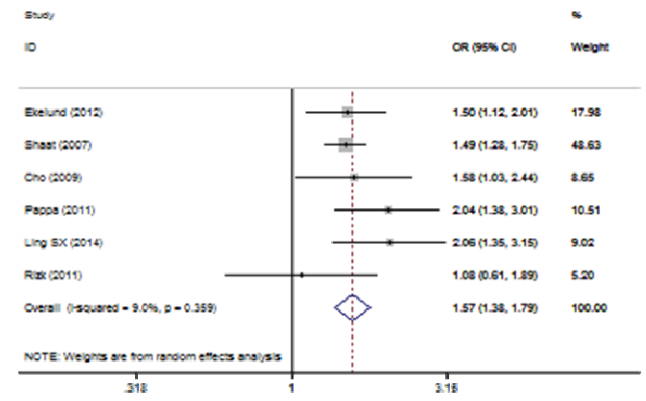

**C**

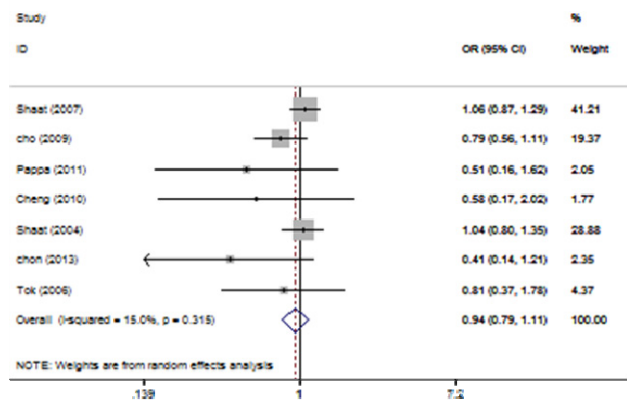

**Supplementary figure 4** Forest plots of genetic variants in GDM with studies after removing articles deviated from both Hardy-Weinberg equilibrium in control ( $P < 0.05$ ) and publication bias (funnel plot outliers) together or only publication bias (funnel plot outliers) alone. (A) IGF2BP2 rs4402960, (B) TCF7L2 rs7903146, (C) PPARG rs1801282. The shadowed squares and their lateral tips indicate the ORs and the corresponding 95% CIs in individual studies, the central lines and lateral tips of the diamonds indicate the pooled ORs and the corresponding 95% CIs. The solid vertical lines indicate no effect.

Supplementary Figure 5: Chromosome locations of genes and SNPs

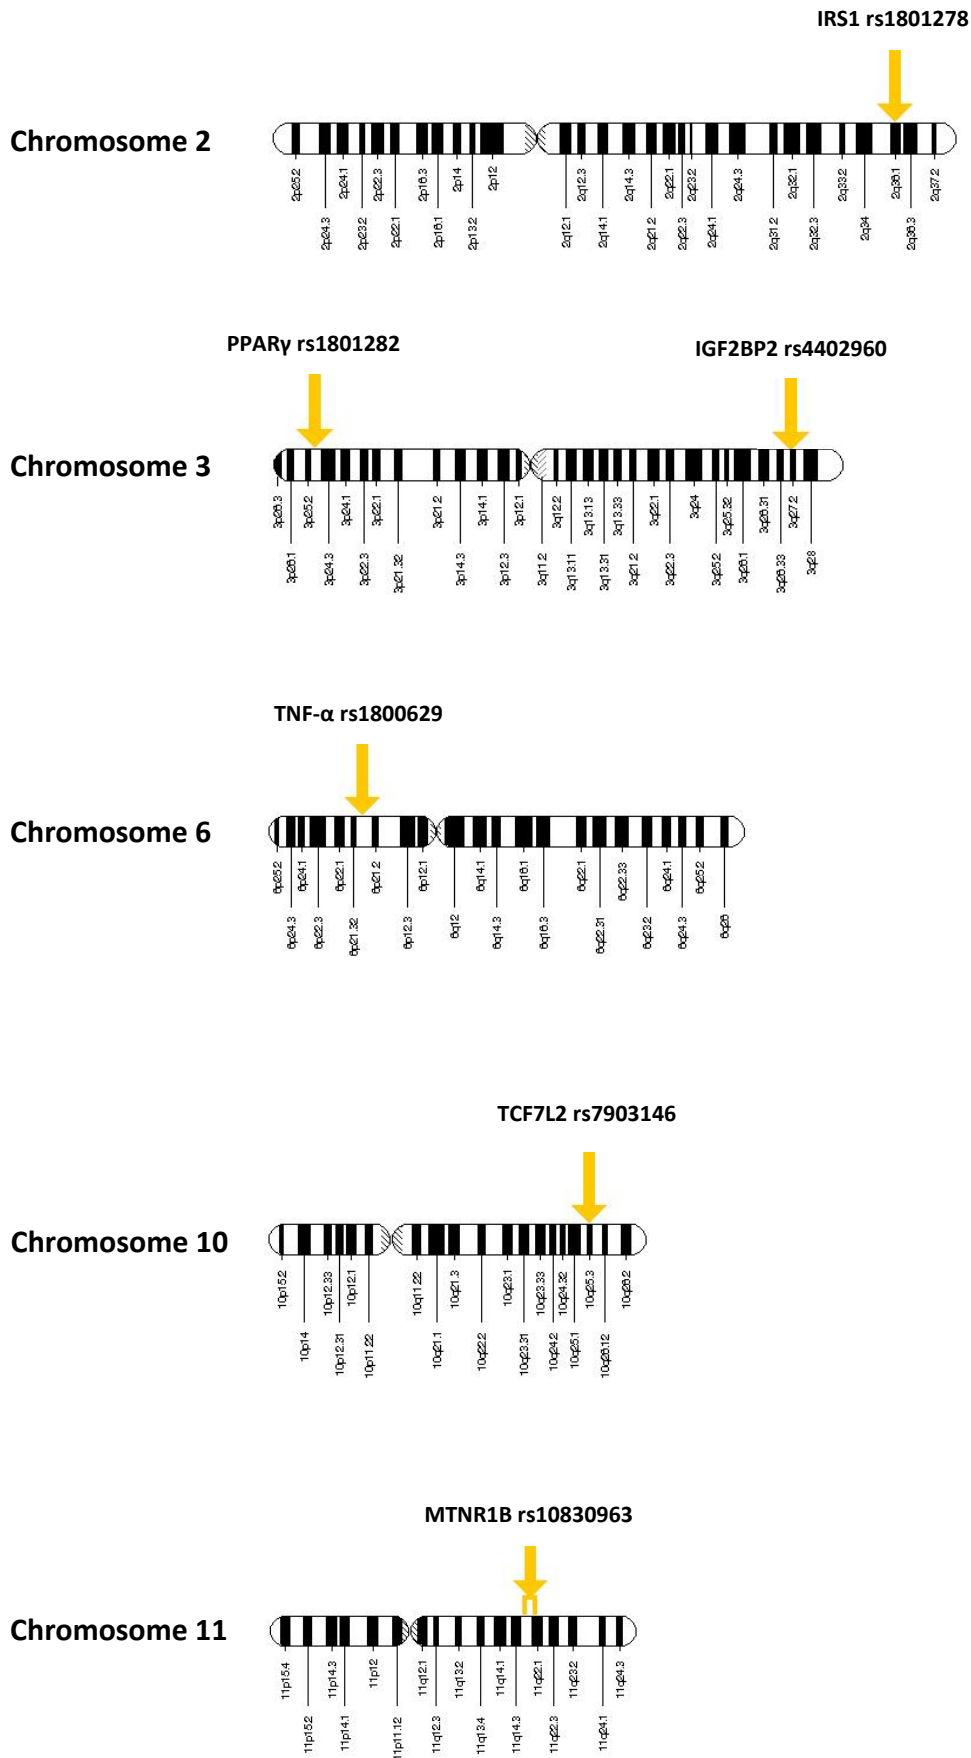

**Supplementary Table 1: Sample sizes estimate (OSSE) of the genetic variants on GDM**

| Gene and SNP      | 80% CI | 90% CI | 95% CI |
|-------------------|--------|--------|--------|
| MTNR1B rs10830963 | 336    | 449    | 556    |
| TCF7L2 rs7903146  | 20,278 | 27,151 | 33,580 |
| IRS1 rs10830963   | 777    | 1,040  | 12,86  |
| PPARG rs1801282   | 2,071  | 2,772  | 3,428  |

**Genetic variants associated with gestational diabetes mellitus: a meta-analysis and subgroup analysis**

Ling Wu, Long Cui, Wing Hung Tam, Ronald C.W. Ma &amp; Chi Chiu Wang

**Supplementary Table 2: Details of genes and genetic variants in GDM**

| <b>Gene name</b>                                    | <b>Symbol</b> | <b>Chromosome location</b> | <b>Variants</b>      | <b>Gene function</b> |
|-----------------------------------------------------|---------------|----------------------------|----------------------|----------------------|
| Insulin-like growth factor 2 mRNA-binding protein 2 | IGF2BP2       | 3q27.2                     | rs4402960            | Insulin secretion    |
| Melatonin receptor 1B                               | MTNR1B        | 11q21-q22                  | rs10830963           | Insulin secretion    |
| Transcription factor 7-like 2                       | TCF7L2        | 10q25.3                    | rs7903146            | Insulin secretion    |
| Insulin receptor substrate 1                        | IRS1          | 2q36                       | rs1801278(Gly972Arg) | Insulin resistance   |
| Peroxisome proliferator-activated receptor gamma    | PPARG         | 3p25                       | rs1801282(Pro12Ala)  | Insulin resistance   |
| Tumor necrosis factor alpha                         | TNF- $\alpha$ | 6p21.3                     | rs1800629(-308G/A)   | Inflammation         |

**Supplementary Table 3: Characteristics of the included genetic association studies of GDM**

| Studies                  | Year | Country  | Sample size |          | Diagnosis criteria <sup>a</sup> |                                | Mean age<br>Cases/Controls | Mean BMI <sup>b</sup><br>Cases/Controls | Mean Pre-BMI <sup>c</sup><br>Cases/Controls | Genotype method <sup>d</sup> |
|--------------------------|------|----------|-------------|----------|---------------------------------|--------------------------------|----------------------------|-----------------------------------------|---------------------------------------------|------------------------------|
|                          |      |          | Cases       | Controls | Cases(mmol/L)                   | Controls(mmol/L)               |                            |                                         |                                             |                              |
| <b>IGF2BP2 rs4402960</b> |      |          |             |          |                                 |                                |                            |                                         |                                             |                              |
| Chon                     | 2013 | Korea    | 95          | 41       | 2012 ADA                        | 50g 1h<7.8                     | 34.3/32.6                  | 29.2/26.8                               | 25.7/22                                     | PCR                          |
| Wang                     | 2011 | China    | 725         | 1039     | 2012 ADA                        | 50g 1h<7.8                     | 32/30                      | NA/NA                                   | 21.7/21.5                                   | Taqman                       |
| Cho                      | 2009 | Korea    | 868         | 632      | NDDG                            | 0h<6.1 HbA <sub>1c</sub> <5.8% | 32/64.7                    | 23.1/23.3                               | NA/NA                                       | Taqman                       |
| <b>MTNR1B rs10830963</b> |      |          |             |          |                                 |                                |                            |                                         |                                             |                              |
| Stuebe                   | 2014 | Carolina | 80          | 1205     | 2012 ADA                        | 50g 1h<7.8                     | NA/NA                      | NA/NA                                   | NA/NA                                       | NA                           |
| Vejraskova               | 2014 | Czech    | 458         | 422      | 1999 WHO                        | 0h<5.6                         | 34.1/34.8                  | 24.3/23.7                               | NA/NA                                       | Taqman                       |
| Chao                     | 2013 | China    | 350         | 480      | IADPSG                          | Normal glucose                 | 32.4/32.0                  | NA/NA                                   | 25.3/24.7                                   | PCR-RFLP                     |
| Vlassi                   | 2012 | Greece   | 77          | 98       | 2012 ADA                        | 50g 1h<7.8                     | 35.5/31.4                  | NA/NA                                   | 25.8/26.8                                   | PCR-RFLP                     |
| DENG                     | 2011 | China    | 87          | 91       | 5.6-10.3-8.6                    | Normal glucose                 | 31.8/29.7                  | NA/NA                                   | 23.6/21.5                                   | Sequencing                   |
| Wang                     | 2011 | China    | 725         | 1039     | 2012 ADA                        | 50g 1h<7.8                     | 32/30                      | NA/NA                                   | 21.7/21.5                                   | Taqman                       |
| Kim                      | 2011 | Korea    | 928         | 990      | 2012 ADA                        | 50g 1h<7.8                     | 33.1/32.2                  | 23.3/21.4                               | NA/NA                                       | Taqman                       |
| <b>TCF7L2 rs7903146</b>  |      |          |             |          |                                 |                                |                            |                                         |                                             |                              |
| Ling                     | 2014 | China    | 100         | 100      | IADPSG                          | 50g 1h<7.8                     | 30/29                      | 27.4/24.2                               | NA/NA                                       | PCR                          |
| Ekelund                  | 2012 | Sweden   | 125         | 476      | 1999 WHO                        | 75g 2h<7.8                     | 32.8/32.2                  | 30.8/25.5                               | NA/NA                                       | Taqman                       |
| Vcelak                   | 2012 | Czech    | 261         | 376      | 1999 WHO                        | Normal glucose                 | 32.8/29.9                  | 23.8/23.3                               | NA/NA                                       | Taqman                       |
| Papadbouolou             | 2011 | Sweden   | 803         | 1110     | IADPSG                          | 75g 2h<9.0                     | NA/NA                      | NA/NA                                   | NA/NA                                       | PCR                          |
| Pappa                    | 2011 | Greek    | 148         | 107      | 5.3-7.8-6.7                     | 75g 2h<7.8                     | 32.5/26.7                  | NA/NA                                   | 26/24.26                                    | PCR-RFLP                     |
| Rizk                     | 2011 | Qatar    | 40          | 74       | NA                              | NA                             | NA/NA                      | NA/NA                                   | NA/NA                                       | NA                           |
| Lauenborg                | 2009 | Danish   | 276         | 2353     | 1999 WHO                        | Normal glucose                 | 43.1/45.2                  | 28.9/25                                 | NA/NA                                       | Taqman                       |
| Cho                      | 2009 | Korean   | 868         | 627      | NDDG                            | 0h<6.1 HbA <sub>1c</sub> <5.8% | 32/64.7                    | 23.1/23.3                               | NA/NA                                       | Taqman                       |
| Shaht                    | 2007 | Sweden   | 585         | 1111     | 2h ≥9.0                         | 75g 2h<9.0                     | 32.3/30.5                  | NA/NA                                   | NA/NA                                       | Taqman                       |
| <b>IRS1 rs1801278</b>    |      |          |             |          |                                 |                                |                            |                                         |                                             |                              |
| Alharbi                  | 2014 | Saudi    | 200         | 300      | 2012 ADA                        | 50g 1h<7.8                     | 32.4/31.3                  | 34.4/33.3                               | NA/NA                                       | PCR-RFLP                     |
| Pappa                    | 2011 | Greece   | 148         | 107      | 5.3-7.8-6.7                     | Normal glucose                 | 32.5/26.6                  | NA/NA                                   | 26/24                                       | PCR-RFLP                     |
| Tok                      | 2006 | Turkey   | 62          | 100      | NDDG                            | 50g 1h<7.8                     | 33.6/NA                    | NA/NA                                   | 26.5/NA                                     | PCR-RFLP                     |
| Fallucca                 | 2006 | Italy    | 309         | 277      | 2012 ADA                        | 50g 1h<7.8                     | 34.1/32.7                  | NA/NA                                   | 25.4/23.8                                   | PCR-RFLP                     |
| Shaht                    | 2005 | sweden   | 588         | 1189     | 2h ≥9.0                         | 2h<9.0                         | 32.2/30.5                  | 24.5/23.1                               | NA/NA                                       | Taqman                       |
| <b>PPARG rs1801282</b>   |      |          |             |          |                                 |                                |                            |                                         |                                             |                              |
| Chon                     | 2013 | Korea    | 95          | 41       | 2012 ADA                        | 50g 1h<7.8                     | 34.3/32.6                  | 29.2/26.8                               | 25.7/22                                     | PCR                          |
| Heude                    | 2011 | France   | 109         | 1571     | 50g ≥7.8                        | 50g 1h<7.8                     | NA/NA                      | NA/NA                                   | 26.8/23.2                                   | Taqman                       |
| Pappa                    | 2011 | Greece   | 148         | 107      | 5.3-7.8-6.7                     | 75g 2h<7.8                     | 32.5/26.7                  | NA/NA                                   | 26/24.3                                     | RFLP                         |
| Cheng                    | 2010 | China    | 55          | 173      | 5.6-10.3-8.6                    | 50g 1h<7.8                     | 27/29.6                    | NA/NA                                   | NA/NA                                       | RFLP                         |
| Cho                      | 2009 | Korea    | 868         | 632      | NDDG                            | 0h<6.1 HbA <sub>1c</sub> <5.8% | 32/64.7                    | 23.1/23.3                               | NA/NA                                       | Taqman                       |
| Zhu and Wu               | 2009 | China    | 179         | 180      | 5.6-10.3-8.6                    | Normal glucose                 | 28.1/27.4                  | 24.6/23.4                               | NA/NA                                       | RFLP                         |
| Lauenborg                | 2009 | Denmark  | 276         | 2383     | 1999 WHO                        | Normal glucose                 | 43.1/45.2                  | 28.9/25                                 | NA/NA                                       | Taqman                       |
| Shaht                    | 2007 | Sweden   | 637         | 1232     | 2h ≥9.0                         | 75g 2h<9.0                     | 32.3/30.5                  | NA/NA                                   | NA/NA                                       | Taqman                       |
| Tok                      | 2006 | Turkey   | 62          | 100      | NDDG                            | 50g 1h<7.8                     | 33.5/31.6                  | NA/NA                                   | 26.6/23                                     | RFLP                         |
| Shaht                    | 2004 | Sweden   | 500         | 550      | 2h ≥9.0                         | 75g 2h<9.0                     | 32.3/NA                    | 30.1/NA                                 | NA/NA                                       | RFLP                         |
| <b>TNF-α rs1800629</b>   |      |          |             |          |                                 |                                |                            |                                         |                                             |                              |
| Flores                   | 2013 | Mexico   | 51          | 44       | IADPSG                          | Normal glucose                 | 33/25.6                    | 29.6/24.5                               | NA/NA                                       | PCR-RFLP                     |
| Montazeri                | 2010 | Malaysia | 110         | 102      | 1999 WHO                        | 50g 1h<7.8                     | NA/NA                      | NA/NA                                   | NA/NA                                       | PCR-RFLP                     |
| Chang                    | 2005 | China    | 35          | 35       | 5.6-10.5-9.2                    | Normal glucose                 | 30/28                      | NA/NA                                   | NA/NA                                       | PCR-RFLP                     |

<sup>a</sup>IADPSG, the International Association of Diabetes and Pregnancy Study Groups; ADA, American Diabetes Association; NDDG, National Diabetes Data Group; WHO, World Health Organization; 2h, postprandial blood sugar 2 hours; 50g, 50 gram oral glucose tolerance test

<sup>b</sup>BMI, Body Mass Index;

<sup>c</sup>Pre-BMI, Pre-pregnancy Body Mass Index

PCR, polymerase chain reaction; RFLP, restriction fragment length polymorphism

NA, not available



**Supplementary Table 4: Distribution of genotypes and alleles in individual studies**

| Studies                                        | Cases     |     |         |      |     | Controls  |     |     |         |      | HWE<br>(p value) |
|------------------------------------------------|-----------|-----|---------|------|-----|-----------|-----|-----|---------|------|------------------|
|                                                | Genotypes |     | alleles |      |     | genotypes |     |     | alleles |      |                  |
| <b>IGF2BP2 rs4402960 (G/T)</b>                 | GG        | GT  | TT      | G    | T   | GG        | GT  | TT  | G       | T    |                  |
| Chon                                           | 57        | 30  | 7       | 144  | 44  | 15        | 24  | 2   | 54      | 28   | 0.053            |
| Wang                                           | 371       | 278 | 56      | 1020 | 390 | 605       | 361 | 59  | 1571    | 479  | 0.596            |
| Cho                                            | 389       | 365 | 103     | 1143 | 571 | 313       | 257 | 57  | 883     | 371  | 0.685            |
| <b>MTNR1B rs10830963 (C/G)</b>                 | CC        | GG  | GC      | C    | G   | CC        | GG  | GC  | C       | G    |                  |
| Stuebe                                         | 43        | 7   | 29      | 115  | 43  | 763       | 78  | 349 | 1875    | 505  | <0.001           |
| Vejrazkova                                     | 169       | 62  | 227     | 565  | 351 | 206       | 32  | 184 | 596     | 248  | 0.298            |
| Chao                                           | 113       | 79  | 158     | 384  | 316 | 172       | 75  | 233 | 577     | 383  | 0.790            |
| Vlassi                                         | 30        | 16  | 31      | 91   | 63  | 56        | 12  | 30  | 142     | 54   | 0.021            |
| DENG                                           | 23        | 26  | 38      | 84   | 90  | 31        | 15  | 45  | 107     | 75   | 0.845            |
| Wang                                           | 199       | 137 | 364     | 762  | 638 | 329       | 191 | 509 | 1167    | 891  | 0.812            |
| Kim                                            | 217       | 256 | 435     | 869  | 947 | 294       | 203 | 469 | 1057    | 875  | 0.528            |
| <b>TCF7L2 rs7903146 (C/T)</b>                  | CC        | CT  | TT      | C    | T   | CC        | CT  | TT  | C       | T    |                  |
| Ling SX                                        | 40        | 36  | 24      | 116  | 84  | 55        | 38  | 7   | 148     | 52   | 0.901            |
| Ekelund                                        | 49        | 56  | 20      | 154  | 96  | 239       | 195 | 42  | 673     | 279  | 0.805            |
| Vcelak                                         | 142       | 102 | 17      | 386  | 136 | 156       | 185 | 35  | 497     | 255  | 0.058            |
| Papadbouolou                                   | 363       | 352 | 88      | 1078 | 528 | 644       | 384 | 82  | 1672    | 548  | 0.020            |
| Pappa                                          | 49        | 81  | 18      | 179  | 117 | 62        | 38  | 7   | 162     | 52   | 0.720            |
| Rizk                                           | 16        | 18  | 6       | 50   | 30  | 29        | 37  | 8   | 95      | 53   | 0.451            |
| Lauenborg                                      | 118       | 125 | 33      | 361  | 191 | 1292      | 863 | 198 | 3447    | 1259 | 0.002            |
| Cho                                            | 803       | 63  | 2       | 1669 | 67  | 596       | 31  | 0   | 1223    | 31   | 0.526            |
| Shaaf                                          | 271       | 255 | 59      | 797  | 373 | 650       | 392 | 69  | 1692    | 530  | 0.339            |
| <b>IRS1 rs1801278 (C/T)</b>                    | CC        | TT  | TC      | C    | T   | CC        | TT  | TC  | C       | T    |                  |
| Alharbi                                        | 189       | 1   | 10      | 388  | 12  | 295       | 0   | 5   | 595     | 5    | 0.884            |
| Pappa                                          | 58        | 17  | 73      | 189  | 107 | 60        | 7   | 40  | 160     | 54   | 0.924            |
| Tok                                            | 53        | 0   | 9       | 115  | 9   | 89        | 0   | 11  | 189     | 11   | 0.561            |
| Fallucca                                       | 271       | 4   | 34      | 576  | 42  | 255       | 0   | 22  | 532     | 22   | 0.491            |
| Shaaf                                          | 534       | 4   | 49      | 1117 | 57  | 1078      | 0   | 111 | 2267    | 111  | 0.091            |
| <b>PPARG rs1801282 (C/G)</b>                   | CC        | CG  | GG      | C    | G   | CC        | CG  | GG  | C       | G    |                  |
| Chon                                           | 89        | 5   | 1       | 183  | 7   | 34        | 7   | 0   | 75      | 7    | 0.550            |
| Heude                                          | 92        | 17  | 0       | 201  | 17  | 1265      | 305 | 1   | 2835    | 307  | <0.001           |
| Pappa                                          | 143       | 5   | 0       | 291  | 5   | 100       | 7   | 0   | 207     | 7    | 0.726            |
| Cheng                                          | 52        | 3   | 0       | 107  | 3   | 157       | 16  | 0   | 330     | 16   | 0.524            |
| Cho                                            | 793       | 71  | 1       | 1657 | 73  | 567       | 63  | 2   | 1197    | 67   | 0.859            |
| Zhu and Wu                                     | 165       | 14  | 0       | 344  | 14  | 155       | 20  | 5   | 330     | 30   | 0.189            |
| Lauenborg                                      | 201       | 60  | 4       | 462  | 68  | 1790      | 542 | 51  | 4122    | 644  | 0.003            |
| Shaaf                                          | 468       | 158 | 11      | 1094 | 180 | 918       | 298 | 16  | 2134    | 330  | 0.134            |
| Tok                                            | 50        | 12  | 0       | 112  | 12  | 84        | 16  | 0   | 184     | 16   | 0.385            |
| Shaaf                                          | 377       | 120 | 3       | 874  | 126 | 423       | 120 | 7   | 966     | 134  | 0.643            |
| <b>TNF-<math>\alpha</math> rs1800629 (G/A)</b> | GG        | GA  | AA      | G    | A   | GG        | GA  | AA  | G       | A    |                  |
| Flores                                         | 43        | 7   | 1       | 93   | 9   | 39        | 5   | 0   | 83      | 5    | 0.689            |
| Montazeri                                      | 103       | 4   | 3       | 210  | 10  | 94        | 6   | 2   | 194     | 20   | <0.001           |
| Chang                                          | 10        | 17  | 8       | 37   | 33  | 22        | 12  | 1   | 56      | 14   | 0.672            |

HWE, Hardy-Weinberg equilibrium in control

Genetic variants associated with gestational diabetes mellitus: a meta-analysis and subgroup analysis

Ling Wu, Long Cui, Wing Hung Tam, Ronald C.W. Ma & Chi Chiu Wang

Supplementary Table 5: Subgroup information of the genetic variants in GDM (with HWE and funnel outliers excluded)

| Subgroup                 | Number of studies | Number of cases | Number of controls | OR(95%CI)        | P (Z) <sup>a</sup> | Heterogeneity I <sup>2</sup> | P (Q) <sup>b</sup> |
|--------------------------|-------------------|-----------------|--------------------|------------------|--------------------|------------------------------|--------------------|
| <b>MTNR1B rs10830963</b> |                   |                 |                    |                  |                    |                              |                    |
| Ethnicity                |                   |                 |                    |                  |                    |                              |                    |
| Asian                    | 4                 | 2090            | 2600               | 1.23 (1.10,1.38) | <0.001             | 37.7%                        | 0.186              |
| Caucasian                | 1                 | 458             | 422                | 1.49 (1.22,1.82) | <0.001             | NA                           | NA                 |
| OGTT                     |                   |                 |                    |                  |                    |                              |                    |
| 75g                      | 3                 | 895             | 993                | 1.38 (1.20,1.57) | <0.001             | 0.0%                         | 0.375              |
| 100g                     | 2                 | 1653            | 2029               | 1.20 (1.01,1.44) | 0.043              | 72.6%                        | 0.056              |
| Genotype method          |                   |                 |                    |                  |                    |                              |                    |
| Taqman                   | 3                 | 2111            | 2451               | 1.28 (1.08,1.51) | 0.004              | 72.2%                        | 0.027              |
| Others                   | 2                 | 437             | 571                | 1.29 (1.08,1.54) | 0.005              | 0.0%                         | 0.375              |
| Sample size              |                   |                 |                    |                  |                    |                              |                    |
| small                    | 1                 | 87              | 91                 | 1.53 (1.01,2.32) | 0.047              | NA                           | NA                 |
| large                    | 4                 | 2461            | 2931               | 1.27 (1.12,1.44) | <0.001             | 58.4%                        | 0.066              |
| Pre-BMI                  |                   |                 |                    |                  |                    |                              |                    |
| <25                      | 2                 | 812             | 1130               | 1.22 (0.9,1.65)  | 0.202              | 54.2%                        | 0.14               |
| ≥25                      | 1                 | 350             | 480                | 1.24 (1.02,1.51) | 0.033              | NA                           | NA                 |
| <b>TCF7L2 rs7903146</b>  |                   |                 |                    |                  |                    |                              |                    |
| Ethnicity                |                   |                 |                    |                  |                    |                              |                    |
| Asian                    | 3                 | 1008            | 801                | 1.58 (1.12,2.23) | 0.009              | 39.1%                        | 0.194              |
| Caucasian                | 3                 | 858             | 1694               | 1.55 (1.35,1.79) | <0.001             | 6.3%                         | 0.344              |
| OGTT                     |                   |                 |                    |                  |                    |                              |                    |
| 75g                      | 4                 | 958             | 1794               | 1.62 (1.39,1.89) | <0.001             | 19.8%                        | 0.291              |
| 100g                     | 2                 | 908             | 701                | 1.36 (0.94,1.97) | 0.100              | 12.3%                        | 0.286              |
| Genotype method          |                   |                 |                    |                  |                    |                              |                    |
| Taqman                   | 3                 | 1578            | 2214               | 1.50 (1.32,1.72) | <0.001             | 0.0%                         | 0.970              |
| Others                   | 3                 | 288             | 281                | 1.73 (1.20,2.50) | 0.003              | 49.8%                        | 0.136              |
| <b>IRS1 rs1801278</b>    |                   |                 |                    |                  |                    |                              |                    |
| Ethnicity                |                   |                 |                    |                  |                    |                              |                    |
| Asian                    | 2                 | 262             | 400                | 2.15 (0.80,5.74) | 0.128              | 50.3%                        | 0.156              |
| Caucasian                | 3                 | 1045            | 1573               | 1.41 (0.99,2.01) | 0.059              | 56.3%                        | 0.101              |
| OGTT                     |                   |                 |                    |                  |                    |                              |                    |
| 75g                      | 2                 | 736             | 1296               | 1.31 (0.82,2.08) | 0.261              | 70.3%                        | 0.067              |
| 100g                     | 3                 | 571             | 677                | 1.88 (1.21,2.94) | 0.005              | 6.8%                         | 0.342              |
| Genotype method          |                   |                 |                    |                  |                    |                              |                    |
| Taqman assay             | 1                 | 588             | 1189               | 1.04 (0.75,1.45) | 0.805              | NA                           | NA                 |
| Others                   | 4                 | 719             | 784                | 1.77 (1.33,2.35) | <0.001             | 0.0%                         | 0.515              |
| <b>PPARG rs1801282</b>   |                   |                 |                    |                  |                    |                              |                    |
| Ethnicity                |                   |                 |                    |                  |                    |                              |                    |
| Asian                    | 4                 | 1080            | 946                | 0.79 (0.59,1.05) | 0.104              | 0.0%                         | 0.410              |
| Caucasian                | 3                 | 1285            | 1889               | 1.04 (0.89,1.22) | 0.608              | 0.0%                         | 0.469              |
| OGTT                     |                   |                 |                    |                  |                    |                              |                    |
| 75g                      | 4                 | 1340            | 2062               | 1.03 (0.89,1.20) | 0.687              | 0.0%                         | 0.503              |
| 100g                     | 3                 | 1025            | 773                | 0.80 (0.53,1.21) | 0.294              | 24.3%                        | 0.267              |
| Genotype method          |                   |                 |                    |                  |                    |                              |                    |
| Taqman                   | 2                 | 1505            | 1864               | 0.95 (0.71,1.26) | 0.706              | 55.9%                        | 0.132              |
| Others                   | 5                 | 860             | 971                | 0.85 (0.62,1.17) | 0.328              | 13.4%                        | 0.329              |

<sup>a</sup> p values in subgroups

<sup>b</sup> p value for Cochran's Q statistic test used to assess the heterogeneity

NA not available.
